# Supplementary material
Source: Royal Society of Chemistry journal article supplement (doi:10.1039/d6dt00405a)
Supplement: d6dt00405a1.pdf [file d6dt00405a1.pdf]

# Structure–Activity Relationships of Morpholine-Modified Silicon(IV) Phthalocyanines as Potential Antidiabetic Agents

Turgut Keleş<sup>a,b</sup>, Zekeriya Biyiklioglu<sup>c\*</sup>, Gökçe Seyhan<sup>d,e</sup>, Burak Barut<sup>d</sup>

*<sup>a</sup>Karadeniz Technical University, Graduate School of Natural and Applied  
Science, Trabzon, Türkiye*

*<sup>b</sup>Central Research Laboratory Application and Research Center, Recep Tayyip  
Erdogan University, Rize, Turkey*

*<sup>c</sup>Karadeniz Technical University, Faculty of Science, Department of Chemistry,  
Trabzon, Türkiye*

*<sup>d</sup>Karadeniz Technical University, Faculty of Pharmacy, Department of  
Biochemistry, Trabzon, Türkiye*

*<sup>e</sup>Karadeniz Technical University, Graduate School of Health Sciences,  
Department of Biochemistry (Pharmacy), Trabzon, Türkiye*

## Experimental

### Chemicals and Reagents

Silicon(IV) phthalocyanine dichloride, iodomethane, 3-(4-morpholinyl)phenol, 1-bromo-3-chloropropane, 4-hydroxybenzyl alcohol, 3,5-dihydroxybenzyl alcohol, sodium hydride, toluene, 18-crown-6, ethanol, potassium carbonate, chloroform, aluminum oxide, silica gel, and activated basic aluminum oxide were obtained from commercial suppliers. Silicon phthalocyanine dichloride, 1-bromo-3-chloropropane, sodium hydride, toluene, 18-crown-6, potassium carbonate, silica gel, and aluminum oxide were purchased from Sigma-Aldrich. Iodomethane and ethanol were obtained from Merck, chloroform from Carlo Erba, and 3-(4-morpholinyl)phenol from Thermo Scientific Chemicals. Thin-layer chromatography (TLC) analyses were performed using Merck TLC plates. All chemicals were used as received without further purification.

### Equipments

Fourier-transform infrared (FT-IR) spectra were recorded using a PerkinElmer 1600 FT-IR spectrophotometer. The  $^1\text{H}$  and  $^{13}\text{C}$  NMR spectra were obtained on an Agilent 400 MHz NMR spectrometer using  $\text{CDCl}_3$  and  $\text{DMSO-d}_6$  as solvents, and the chemical shifts ( $\delta$ ) were referenced to tetramethylsilane (TMS) as an internal standard. Mass spectrometric analyses were carried out using a Bruker Microflex LT MALDI-TOF mass spectrometer and a Thermo Surveyor TSQ Quantum Access system. UV-Vis absorption measurements were performed at room temperature on a PerkinElmer Lambda 25 UV-Vis spectrophotometer.

### *In vitro* $\alpha$ -glycosidase inhibition assay

All compounds'  $\alpha$ -glycosidase inhibition properties were measured according to our previously published procedures<sup>43</sup>. The stock solutions of compounds were prepared by dissolving the compounds in dimethyl sulfoxide at 2 mM and subsequently diluted to 500  $\mu\text{M}$  with distilled water. These solutions were then utilized in the study. Acarbose (Sigma-Aldrich, A8980) was the standard inhibitor. In a 96-well plate, 100  $\mu\text{L}$   $\alpha$ -glycosidase (Sigma-Aldrich, G5003) (0.5 U/mL) was added to the compounds, and acarbose at different concentrations (12.5–100  $\mu\text{M}$ ) in 50  $\mu\text{L}$  0.1 M phosphate buffer (pH = 6.9). Then, the

mixtures were incubated at room temperature for 10 min. Afterward, 50  $\mu\text{L}$  of *p*-nitrophenyl- $\alpha$ -D-glucopyranoside (4-pNPG) (Sigma-Aldrich, N1377) (5 mM) solution was added as substrate and incubated for 10 min at room temperature. Absorbance was detected at 405 nm using a microplate reader (Thermo Scientific Multiskan<sup>TM</sup> Go Microplate Spectrophotometer), and the inhibition rate was calculated as follows:

$$\text{Inhibition\%} = \left[ \frac{A_A}{A_B} \right] \times 100$$

Where  $A_A$  and  $A_B$  represent the absorbance of the without compound and with compound, respectively.  $\text{IC}_{50}$  value was calculated.

### ***In vitro* $\alpha$ -amylase inhibition assay**

All compound's  $\alpha$ -amylase inhibition properties were conducted per the established procedure, with minor modifications<sup>44</sup>. Acarbose was used as the standard inhibitor. In a 96-well plate, 10  $\mu\text{L}$   $\alpha$ -amylase (Sigma-Aldrich, A3176) (50 U/mL) was added to the compounds, and acarbose at different concentrations (12.5–100  $\mu\text{M}$ ) in 50  $\mu\text{L}$  100 mM phosphate buffer (pH = 6.8). Then, the mixtures were incubated at room temperature for 20 min. Afterward, 150  $\mu\text{L}$  of 1% starch solution was added as substrate and incubated for 20 min at room temperature. Then, 20  $\mu\text{L}$  of 3,5-dinitrosalicylic acid (DNSA) reagent (containing DNSA (Sigma-Aldrich, D0550), potassium sodium tartrate (Sigma-Aldrich, S6170) and sodium hydroxide (Tekkim, TK.170510) (NaOH)) and finally 20  $\mu\text{L}$  of 2 N NaOH are added and incubated for 20 min at 100°C in a thermo shaker. Absorbance was detected at 540 nm using a microplate reader, and the inhibition rate was calculated as follows:

$$\text{Inhibition\%} = \left[ \frac{A_A}{A_B} \right] \times 100$$

Where  $A_A$  and  $A_B$  represent the absorbance of the without compound and with compound, respectively.  $\text{IC}_{50}$  value was calculated.

## Kinetic analysis

Kinetic analyses of the compounds (**MT-C3-H-Si** and **MT-C3-D-Si**) showed the highest effect on  $\alpha$ -glycosidase was performed. The type of inhibition type and the  $K_i$  value were determined using the Lineweaver-Burk plot. In the graph, the value of  $K_m$  is determined by the corresponding value on the X axis ( $1/[S]$ ), and the value of  $V_{max}$  is determined by the corresponding value on the Y axis ( $1/V$ ). The  $K_i$  value, which represents the inhibition constant, is then calculated using the formula below <sup>45</sup>:

$$\frac{1}{V} = \frac{K_m}{V_{max}} \left( 1 + \frac{[I]}{K_i} \right) \times \frac{1}{[S]} + \frac{1}{V_{max}} \left( 1 + \frac{[I]}{K_i} \right)$$

Where  $V$  is the reaction rate,  $K_m$  is the Michaelis-Menten constant, and  $V_{max}$  is the maximum rate the reaction reaches.  $[I]$  and  $[S]$  are the concentrations of inhibitor and substrate, respectively <sup>46</sup>. In both studies, the enzyme concentration was kept constant at 0.5 U/mL, and 2.5, 5, 10, and 20 mM substrates were used. As calculated  $IC_{50}$  values, 16.02  $\mu$ M were studied for **MT-C3-H-Si** and 44.14  $\mu$ M for **MT-C3-D-Si**. Then,  $\alpha$ -glycosidase inhibitory properties of the compounds were performed according to the above procedure. The results were graphed using Microsoft Excel 13.

## Statistical analysis

GraphPad Prism Software version 5.0 (San Diego, California, USA) was used for all the statistical analyses. Statistical analysis was performed by one-way analysis of variance (ANOVA) followed by Tukey's tests for enzyme inhibition.

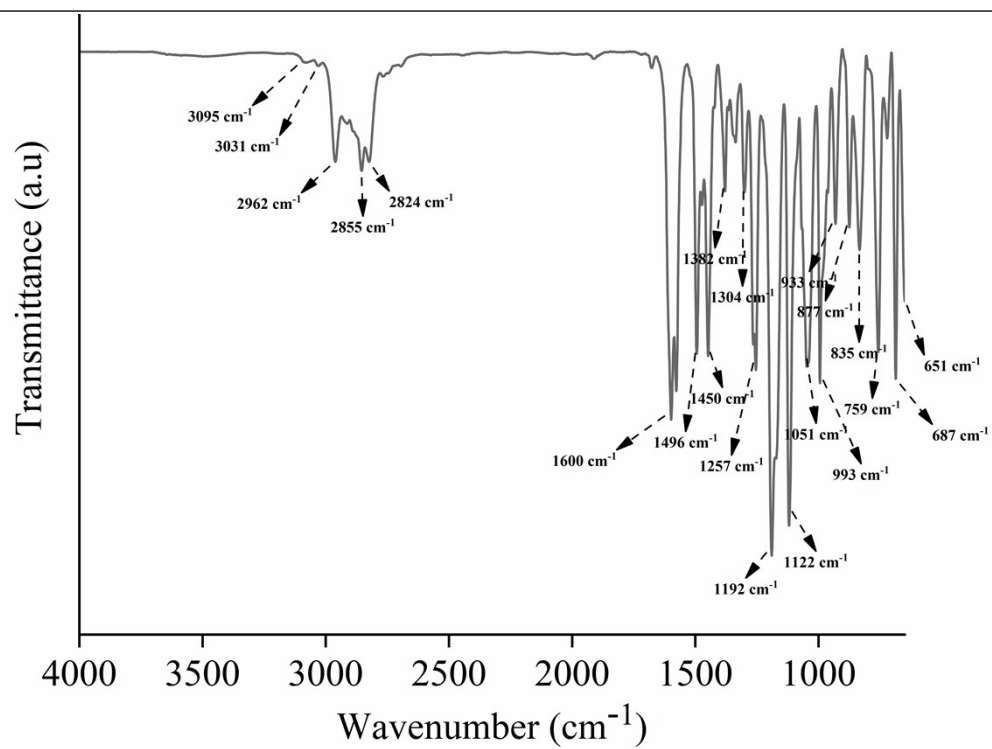

**Figure S1.** FT-IR spectrum of the MT-C3-Cl.

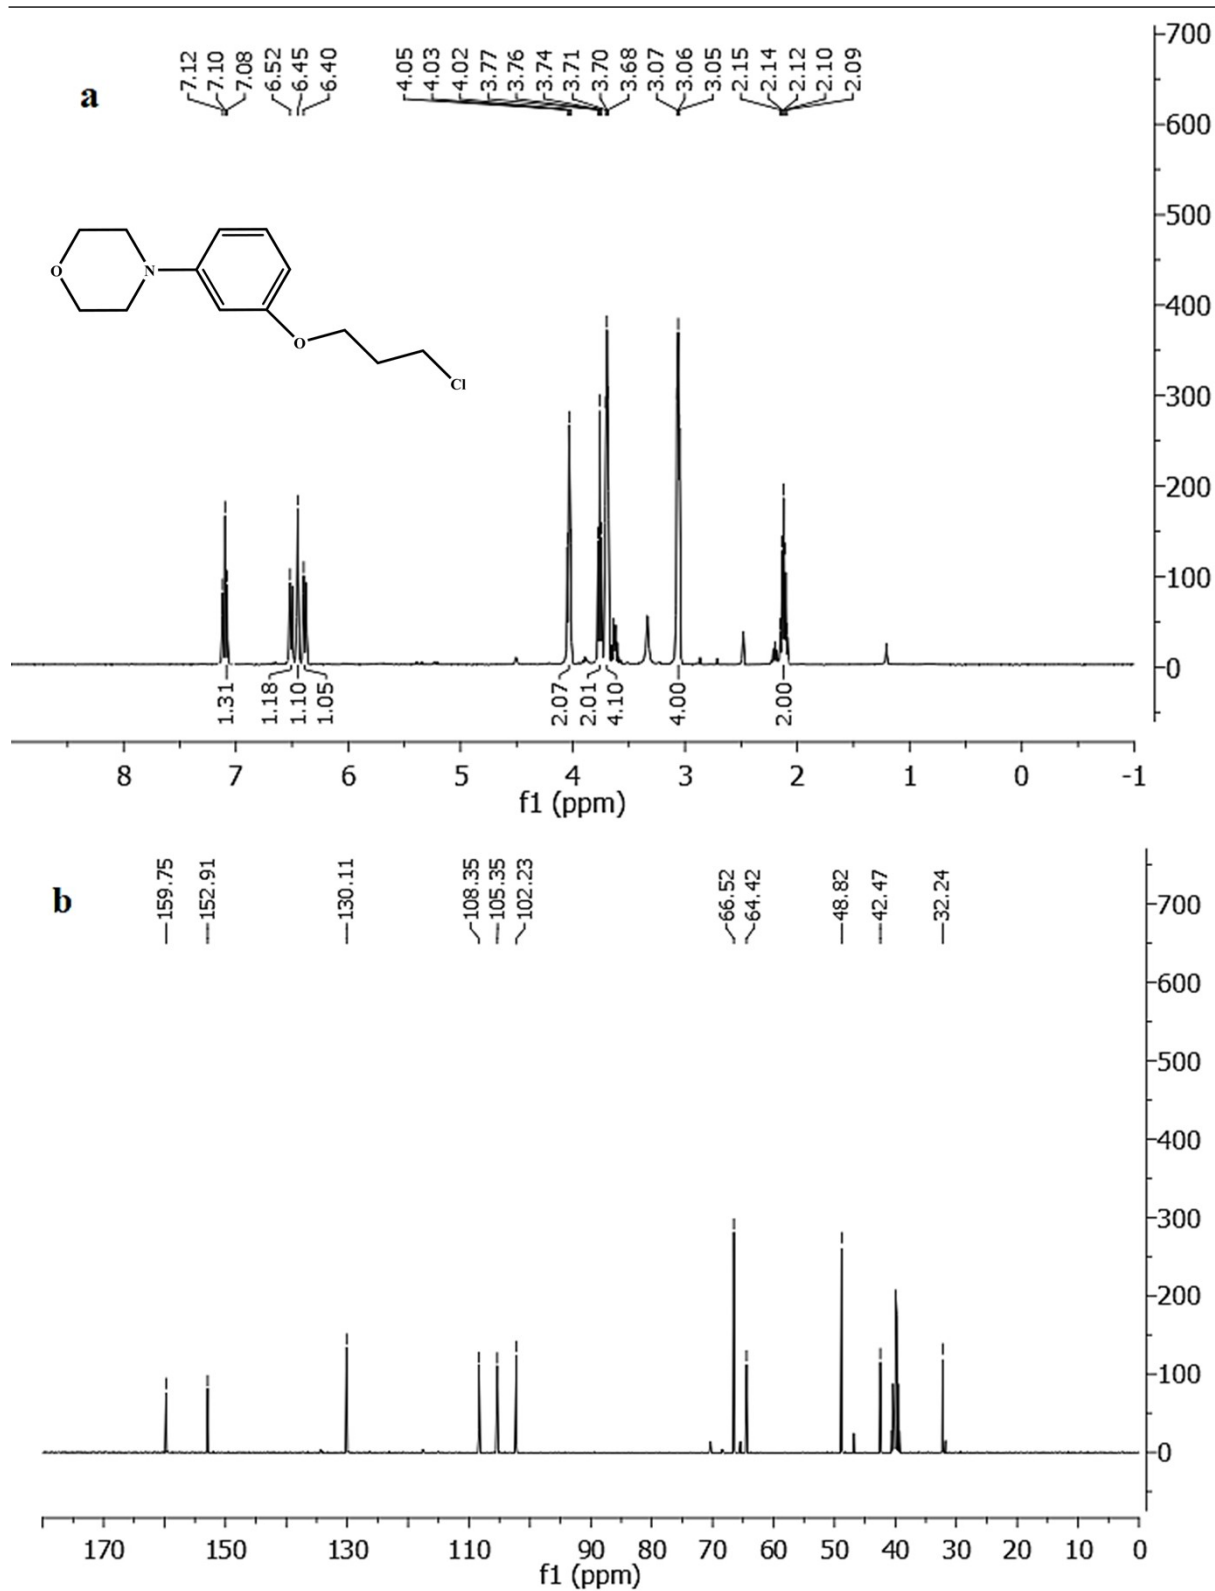

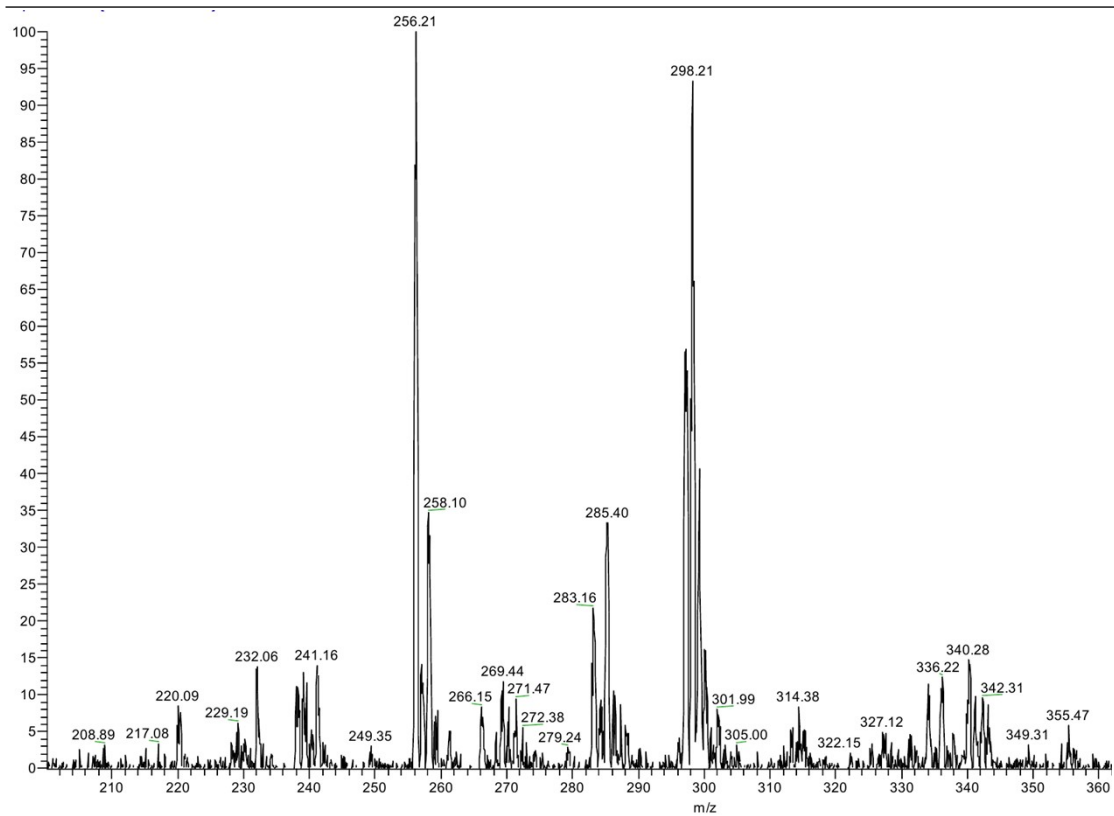

**Figure S3.** ESI-MS spectrum of MT-C3-Cl.

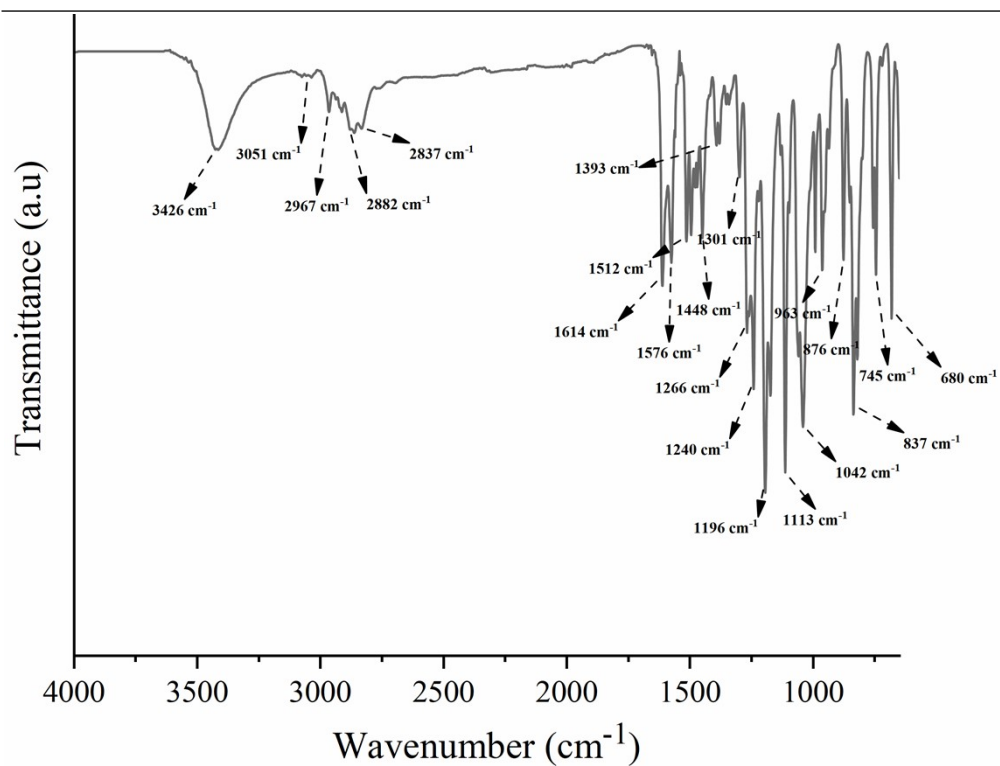

**Figure S4.** FT-IR spectrum of MT-C3-H-OH.

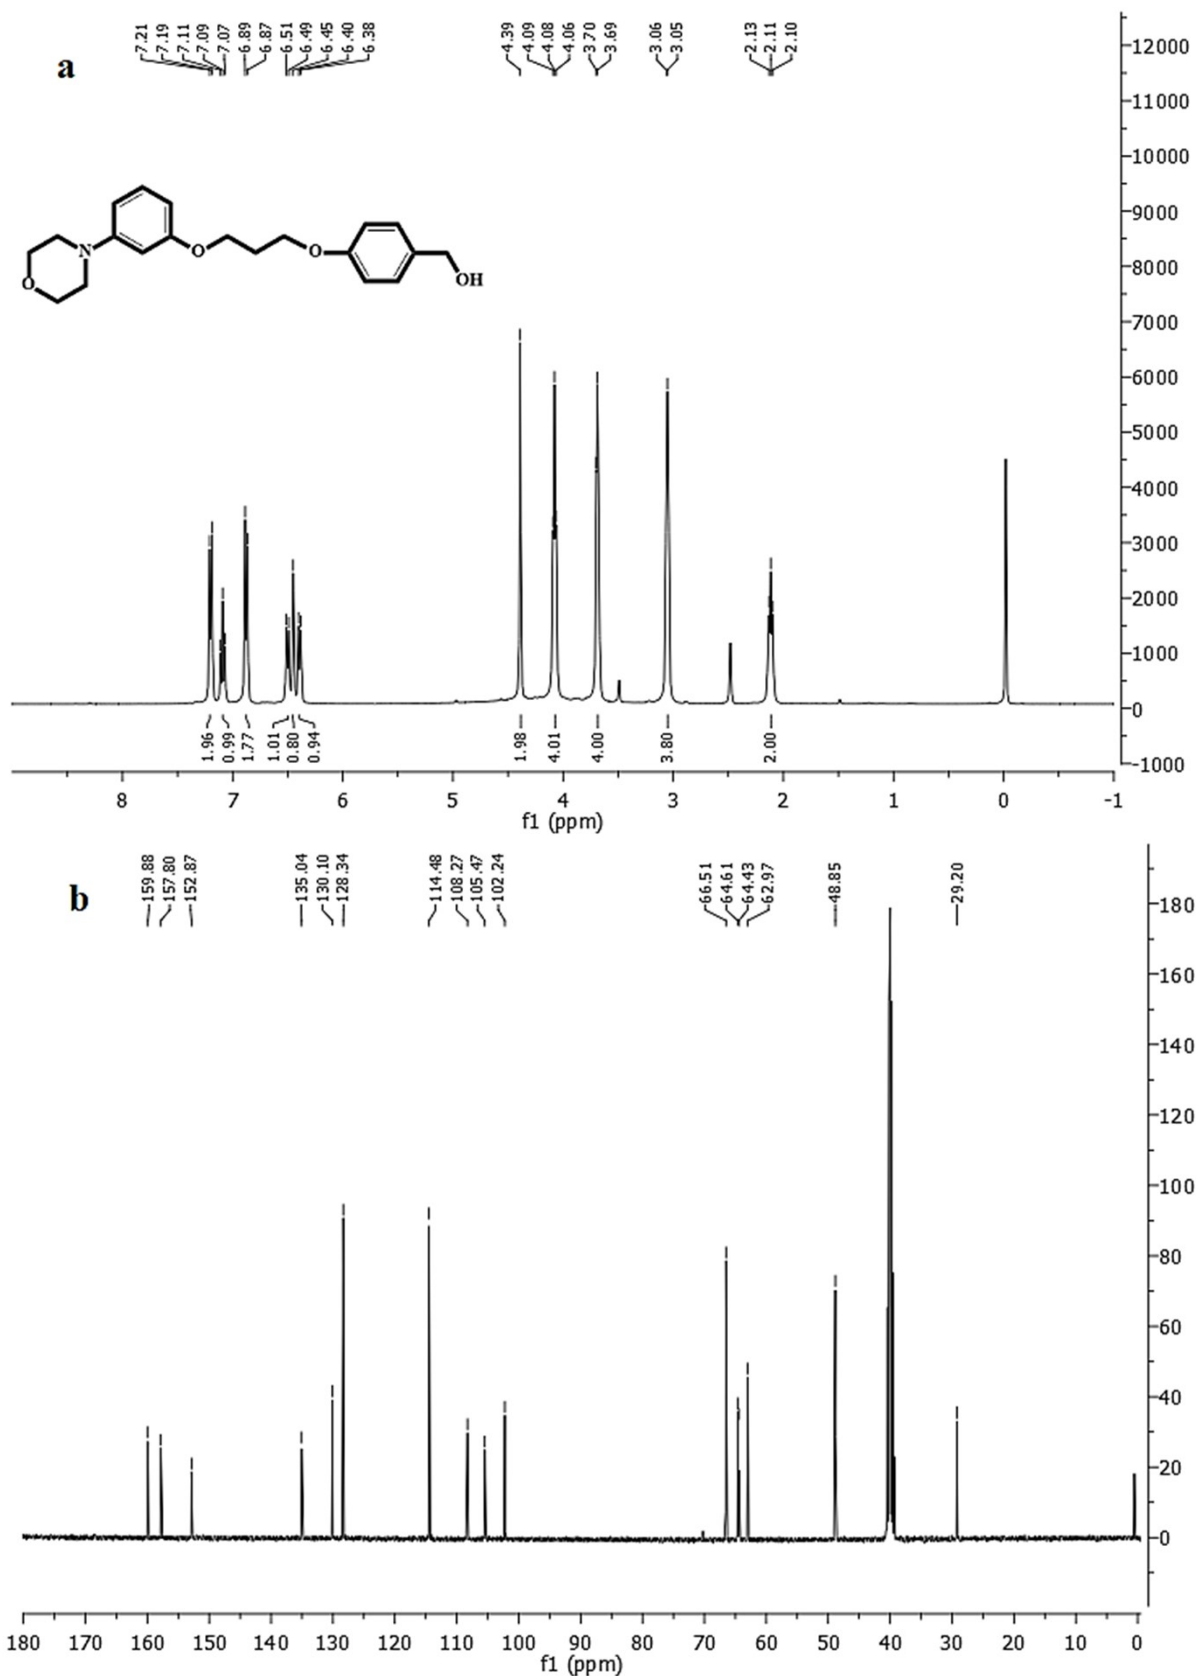

**Figure S5.** <sup>1</sup>H NMR (a) and <sup>13</sup>C NMR (b) spectra of MT-C3-H-OH recorded in DMSO-d<sub>6</sub>.

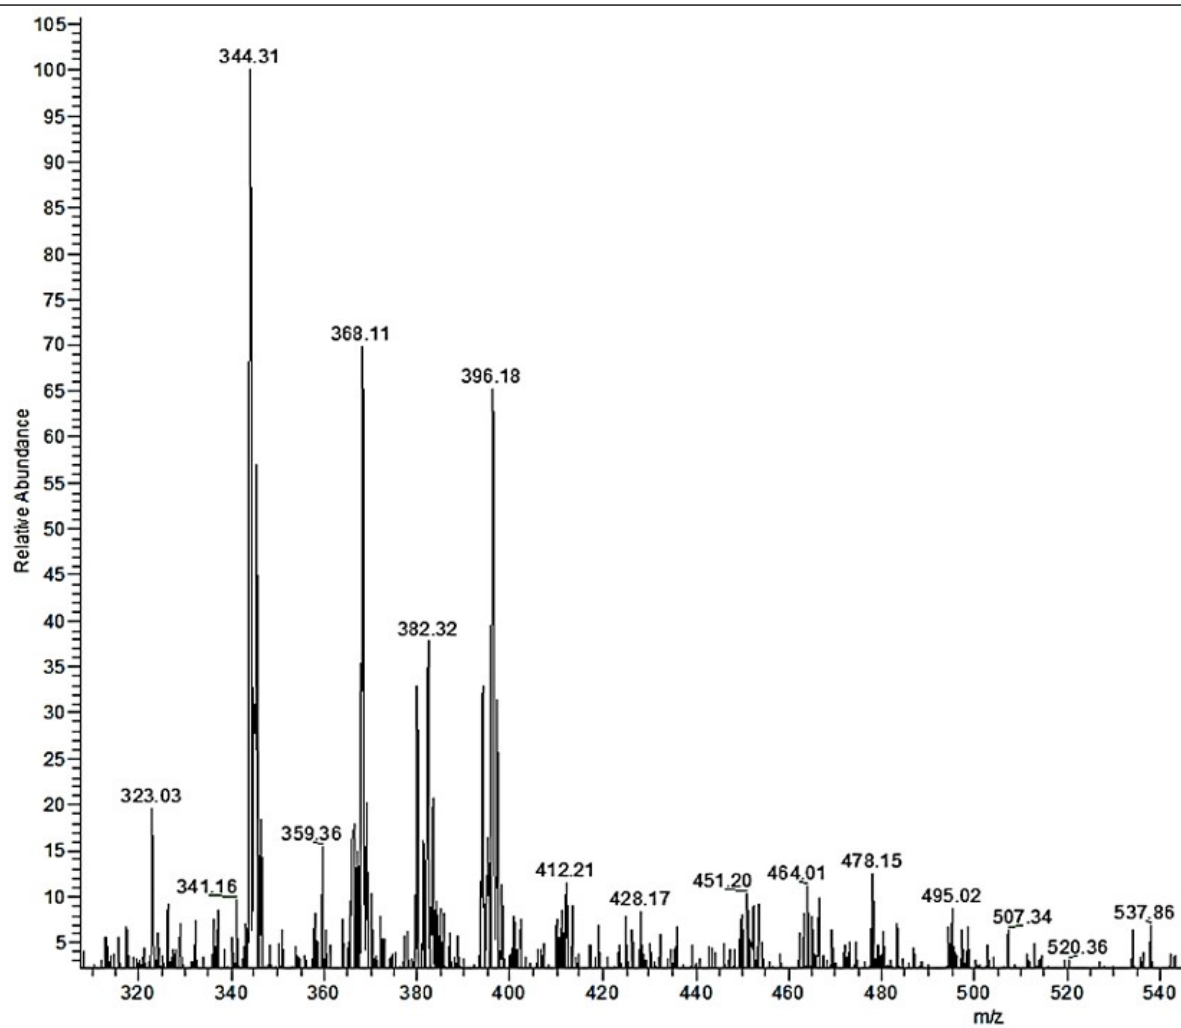

**Figure S6.** ESI-MS spectrum of MT-C3-H-OH.

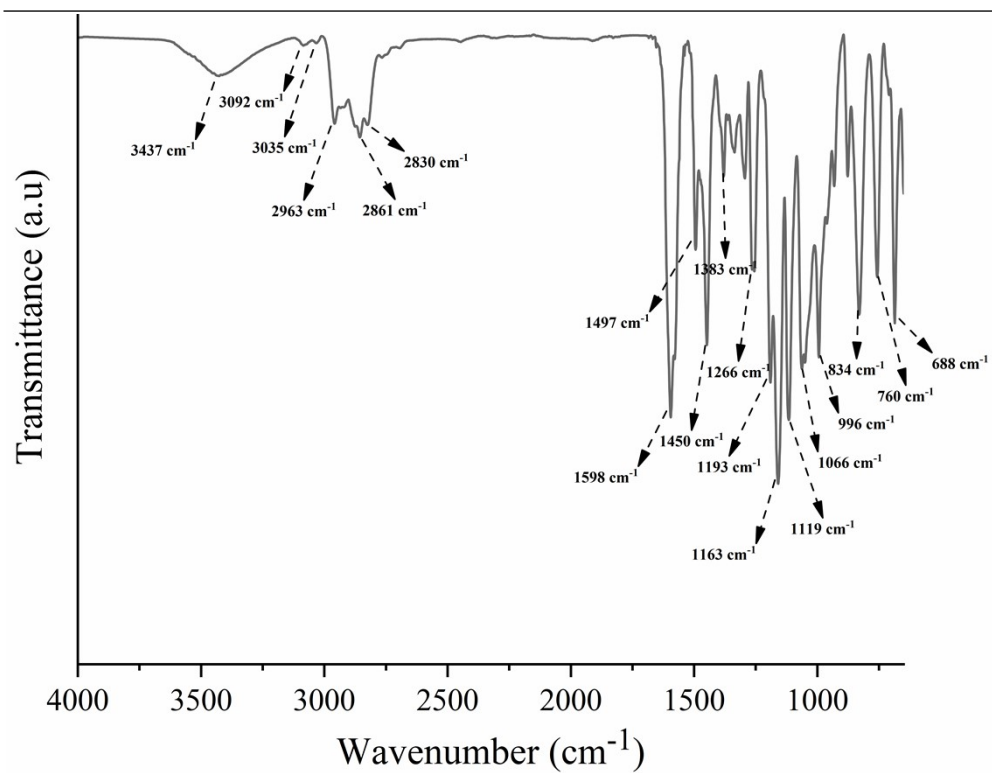

**Figure S7.** FT-IR spectrum of MT-C3-D-OH.

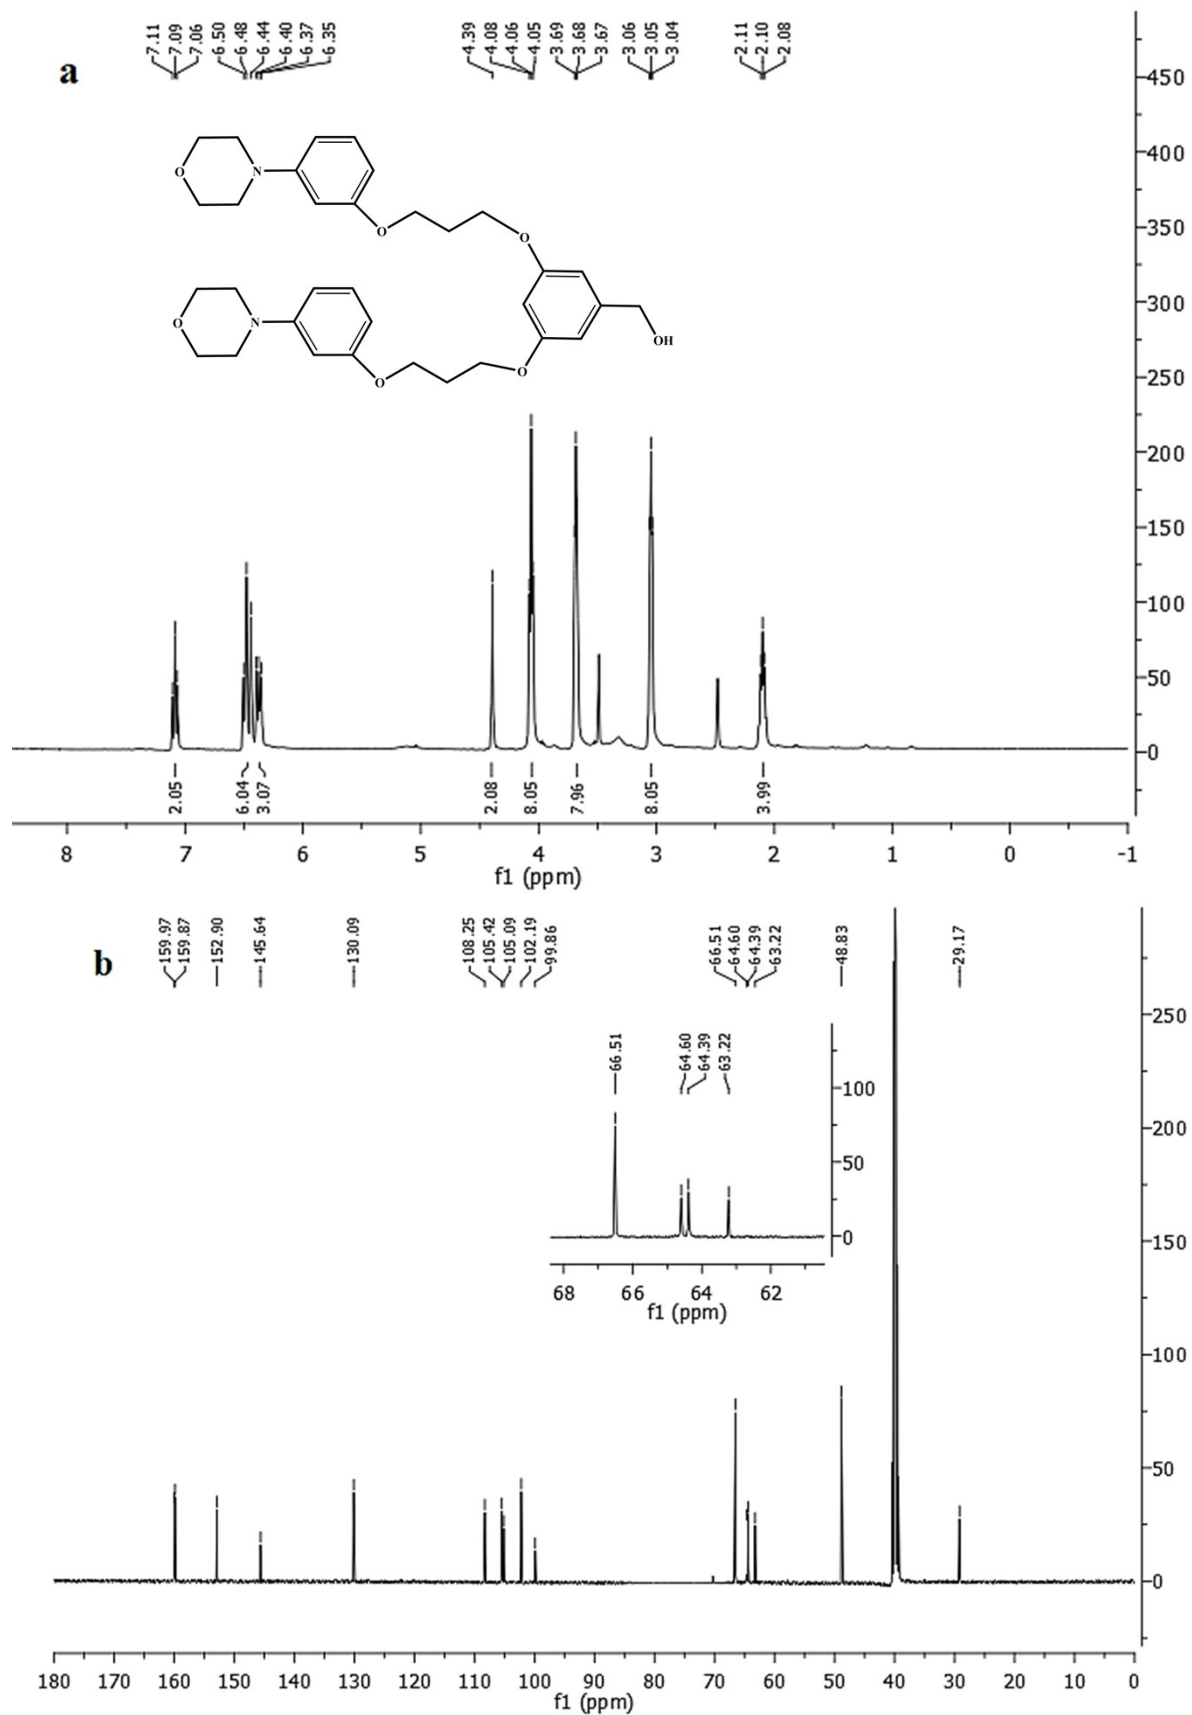

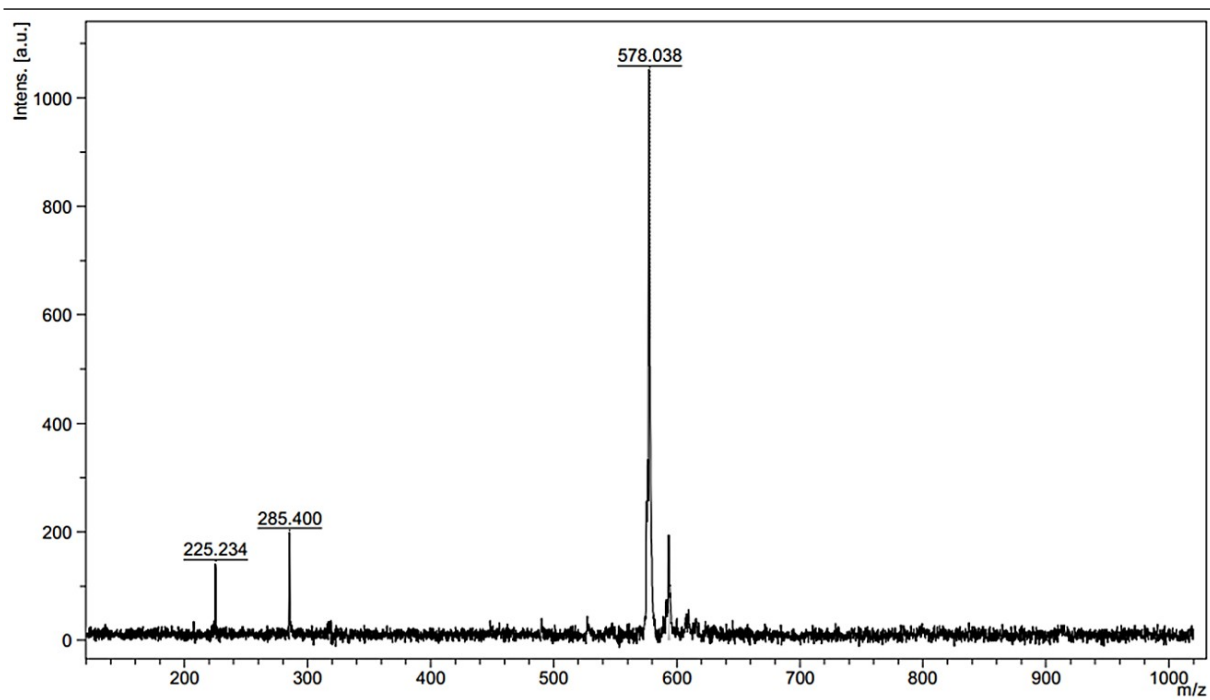

**Figure S9.** MALDI-TOF MS spectrum of MT-C3-D-OH.

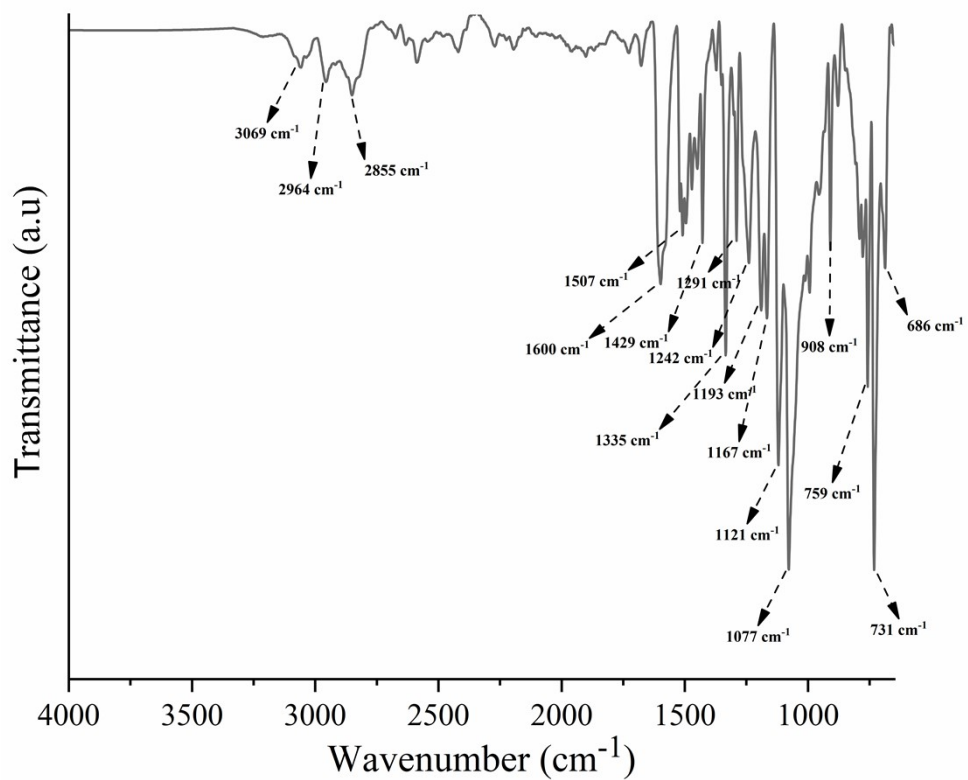

**Figure S10.** FT-IR spectrum of MT-C3-H-Si.

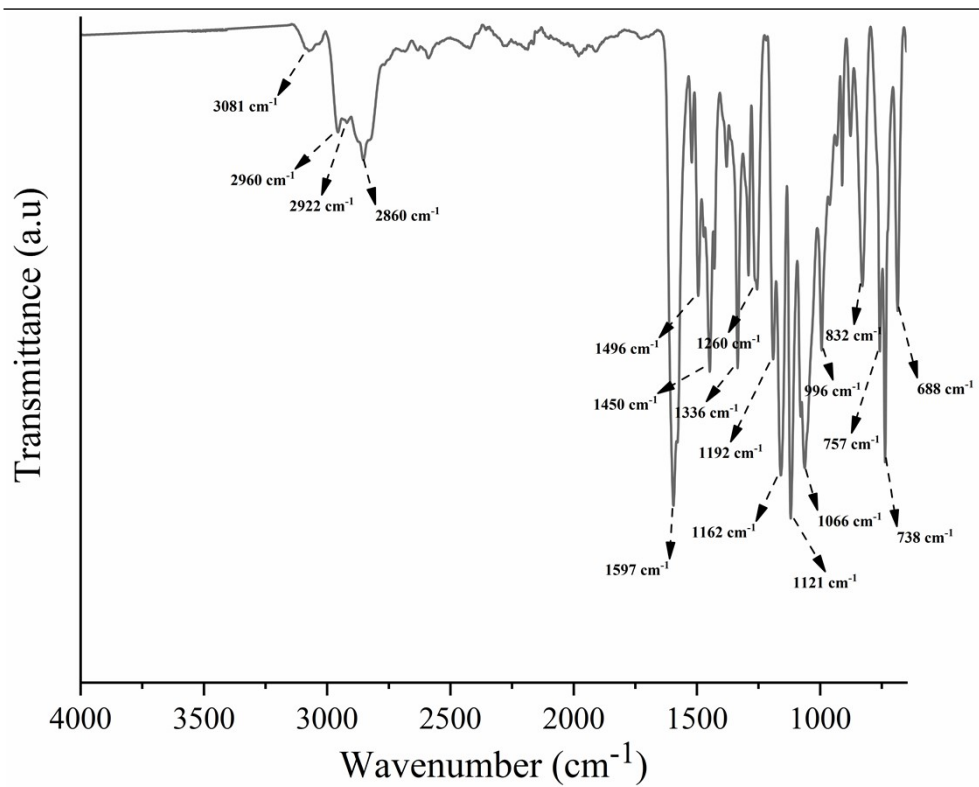

**Figure S11.** FT-IR spectrum of MT-C3-D-Si.

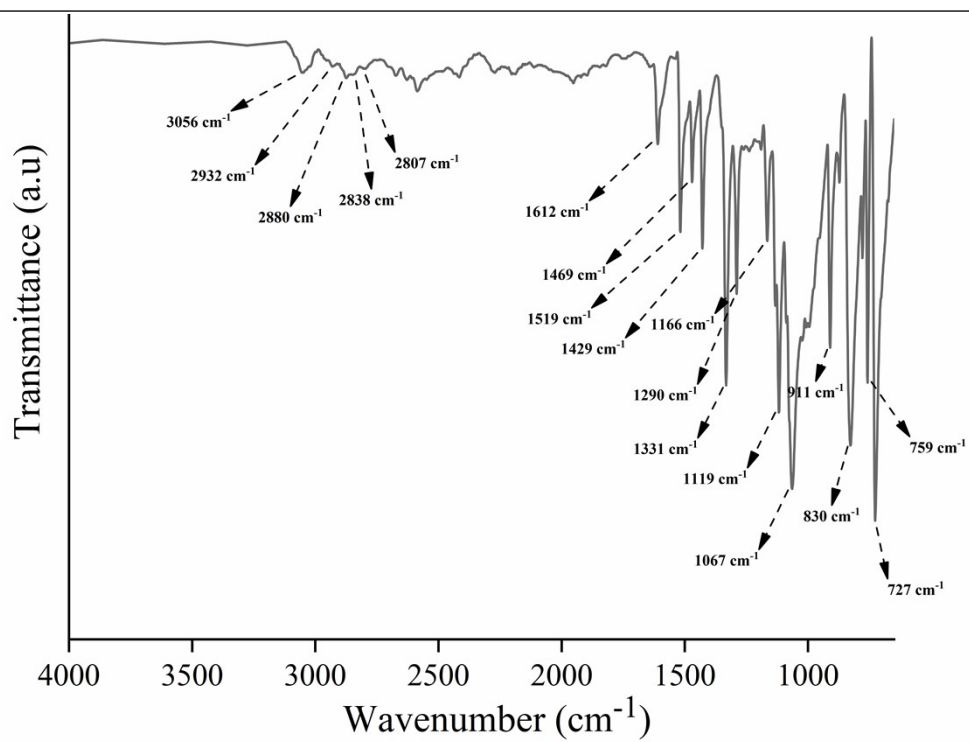

**Figure S12.** FT-IR spectrum of MT-C3-H-SiQ.

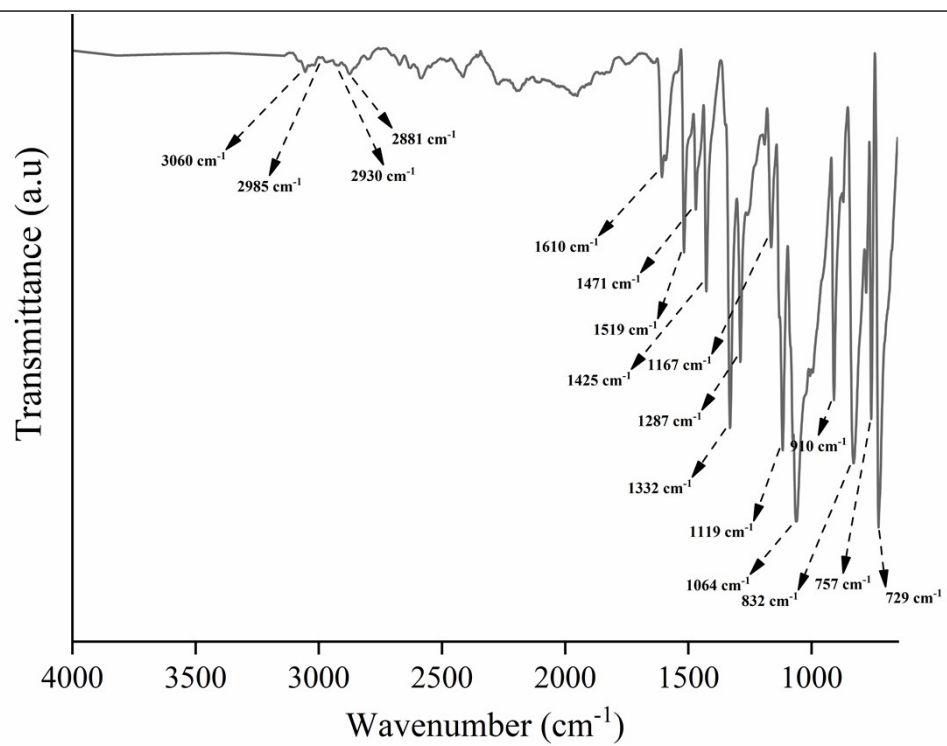

**Figure S13.** FT-IR spectrum of MT-C3-D-SiQ.
